# Supplementary material for: Self-assembly of manganese oxide nanoparticles and hollow spheres. Catalytic activity in carbon monoxide oxidation
Source: Royal Society of Chemistry journal article supplement (doi:10.1039/c1cc11764e), 2011-01-01

## Supplemental Material

### S1. Synthetic Procedures

*MnO<sub>2</sub>-C (control reaction).* MnSO<sub>4</sub>·H<sub>2</sub>O (0.254g, 1.5 mmol) was dissolved in 25 mL of water with stirring. Separately, KMnO<sub>4</sub> (0.158 g, 1.0 mmol) was also dissolved in 25 mL of water. The KMnO<sub>4</sub> solution was added to the MnSO<sub>4</sub> solution with vigorous stirring, resulting in the immediate formation of a brown precipitate. After stirring for 15 minutes, the solid was isolated by filtration through a medium porosity glass frit, washed thoroughly with water three times, and dried at 110 °C.

*MnO<sub>2</sub>-AA.* The procedure for MnO<sub>2</sub>-C was carried out, with the inclusion of 1.43 mL (25 mmol) of acetic acid being added to the MnSO<sub>4</sub> solution and an additional 50 mL of water being added to the stirred precipitate slurry prior to filtration.

*MnO<sub>2</sub>-PA.* The procedure for MnO<sub>2</sub>-C was carried out, with the inclusion of 1.87 mL (25 mmol) of propionic acid being added to the MnSO<sub>4</sub> solution and an additional 50 mL of water being added to the stirred precipitate slurry prior to filtration.

*MnO<sub>2</sub>-BA.* The procedure for MnO<sub>2</sub>-C was carried out, with the inclusion of 2.28 mL (25 mmol) of butyric acid being added to the MnSO<sub>4</sub> solution and an additional 50 mL of water being added to the stirred precipitate slurry prior to filtration.

### S2. TEM image of MnO<sub>2</sub>-BA hollow shell fragment

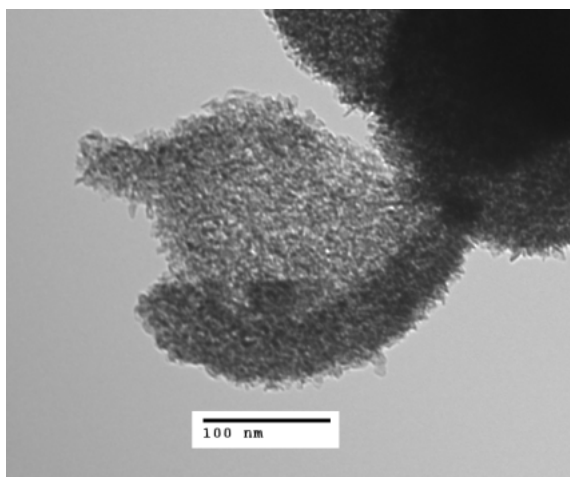

**S3.** Additional TEM images of MnO<sub>2</sub>-C, MnO<sub>2</sub>-AA, MnO<sub>2</sub>-PA, and MnO<sub>2</sub>-BA.

**MnO<sub>2</sub>-C**

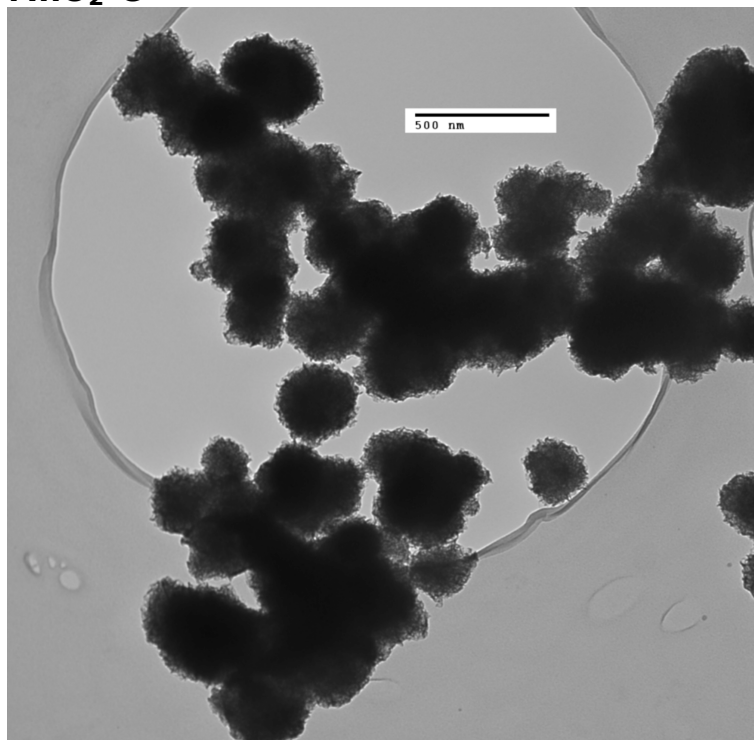

**MnO<sub>2</sub>-AA**

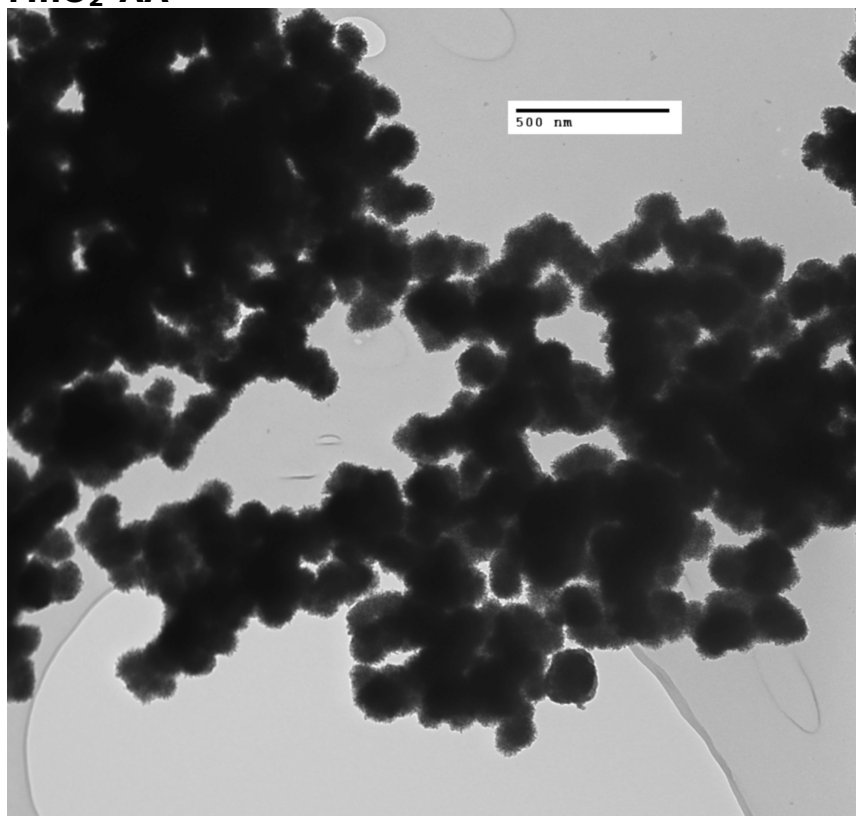

**MnO<sub>2</sub>-PA**

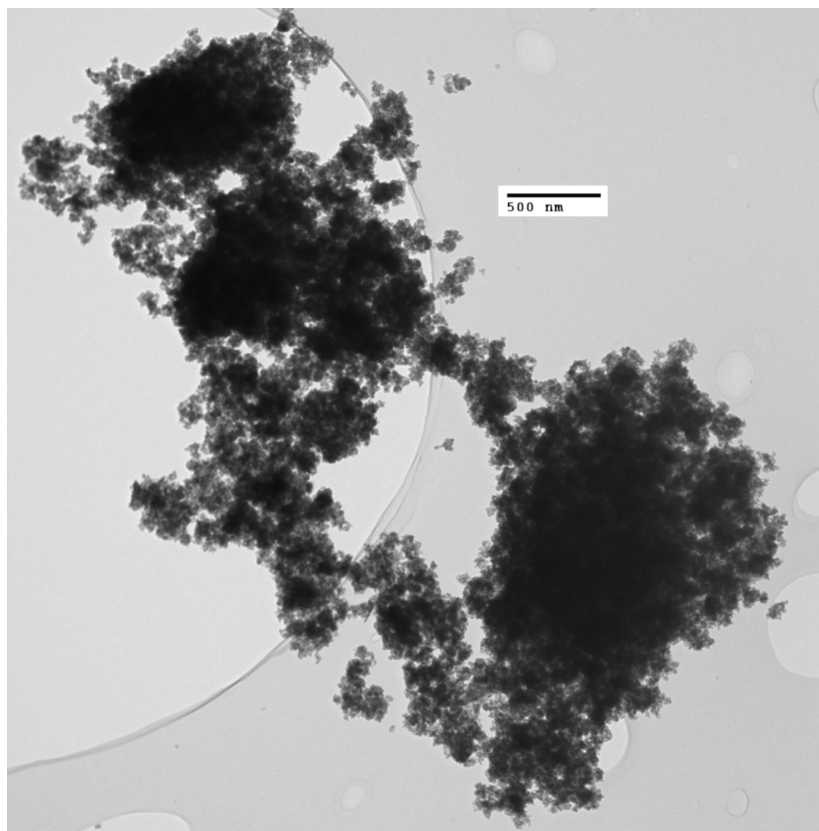

**MnO<sub>2</sub>-BA**

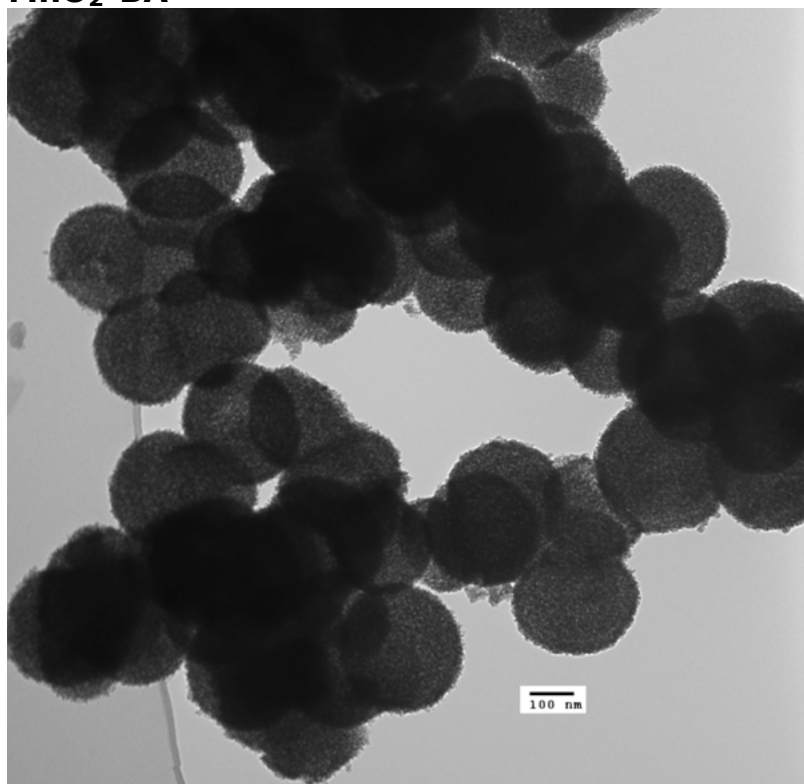

#### S4. XRD patterns of MnO<sub>2</sub>-C, MnO<sub>2</sub>-AA, MnO<sub>2</sub>-PA, and MnO<sub>2</sub>-BA.

##### MnO<sub>2</sub>-C

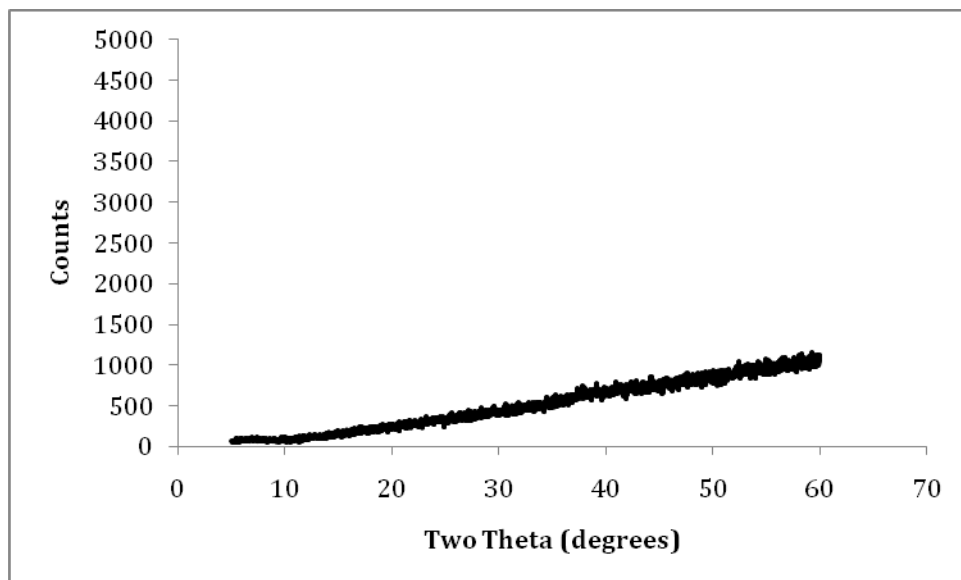

##### MnO<sub>2</sub>-AA

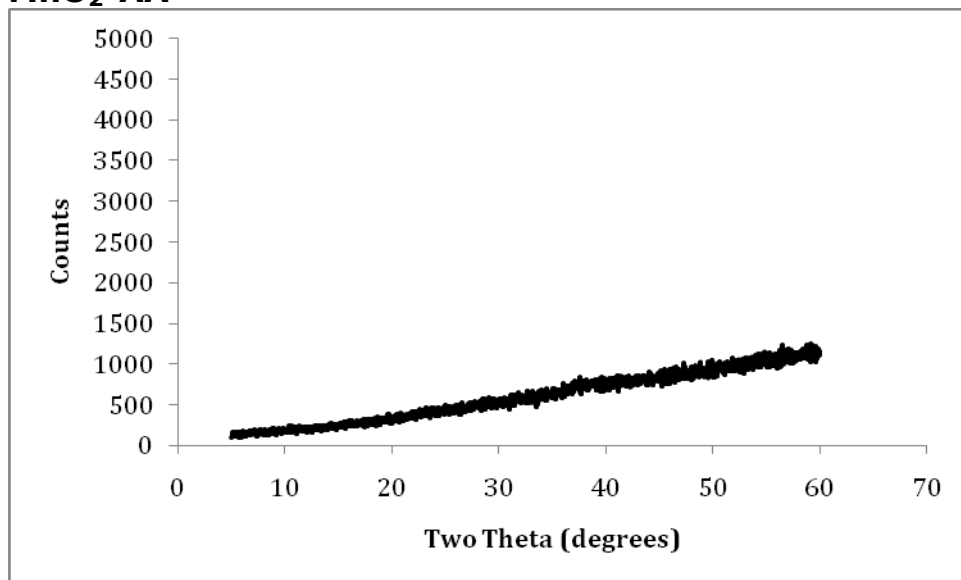

##### MnO<sub>2</sub>-PA

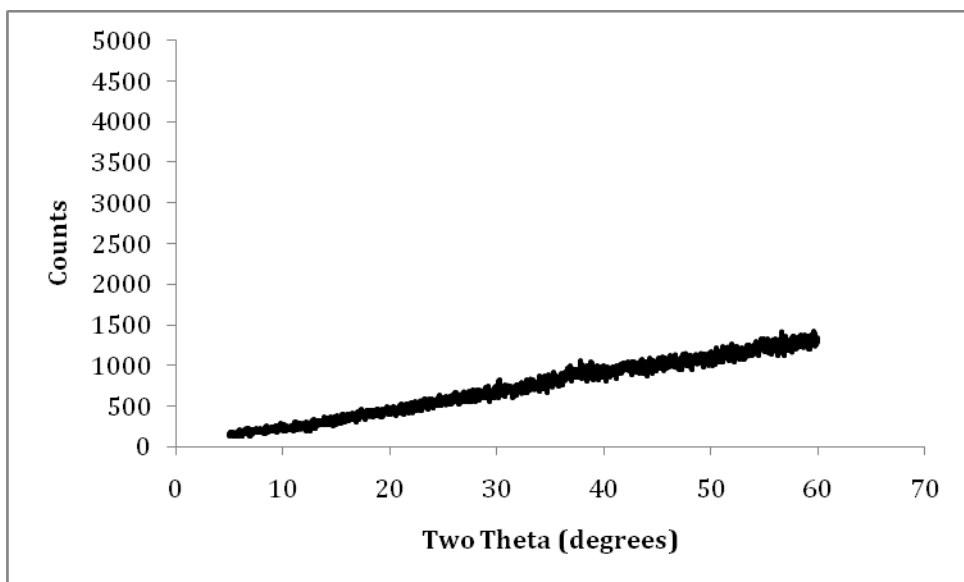

### **MnO<sub>2</sub>-BA**

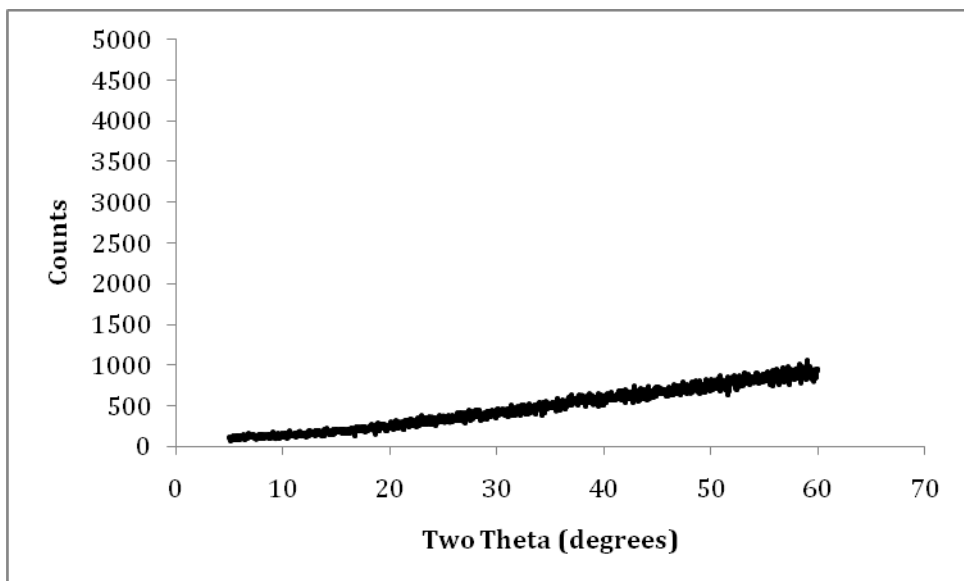

Supplement: c1cc11764e.pdf [file c1cc11764e.pdf]
